# Supplementary material for: A Novel Autosomal Recessive Variant of the NRL Gene Causing Enhanced S-Cone Syndrome: A Morpho-Functional Analysis of Two Unrelated Pediatric Patients
Source: MDPI journal article supplement (doi:10.3390/diagnostics12092183), 2022-09-09
Supplement: s1 [file s1]

## Supplemental Material

### A - Pedigree of Patient 1

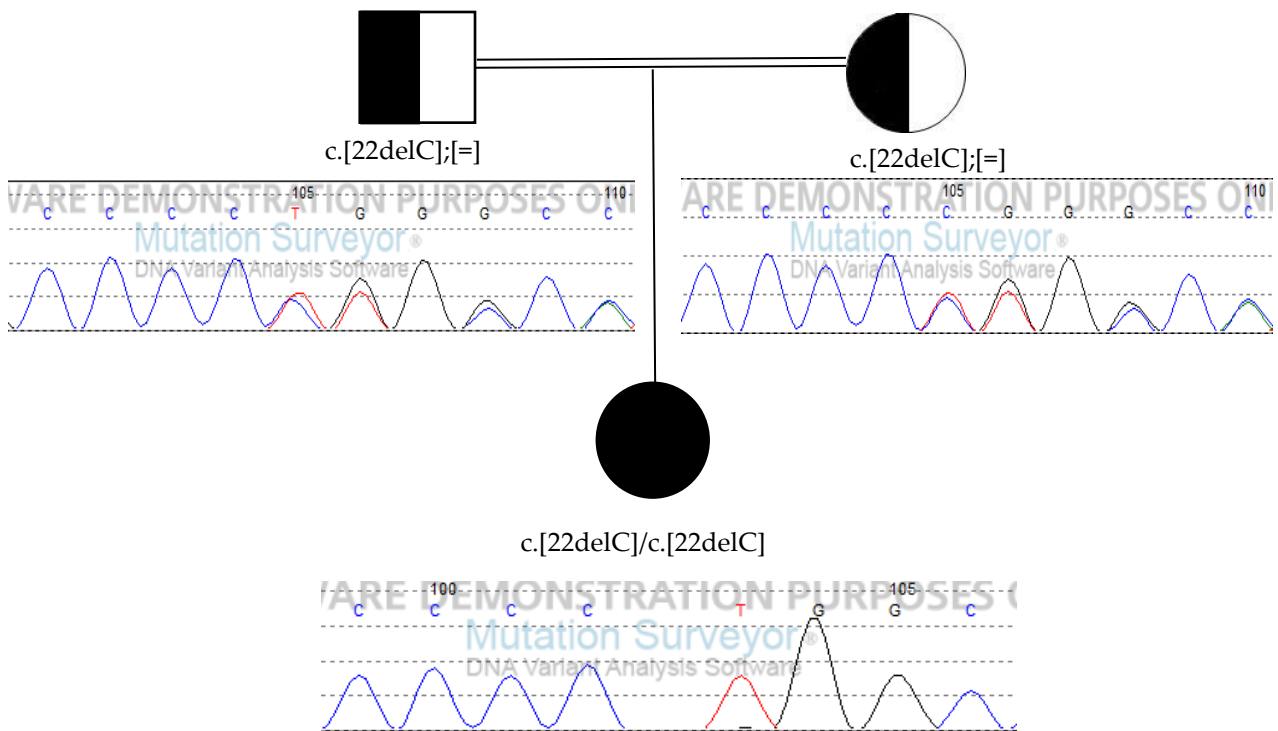

### B - Pedigree of Patient 2

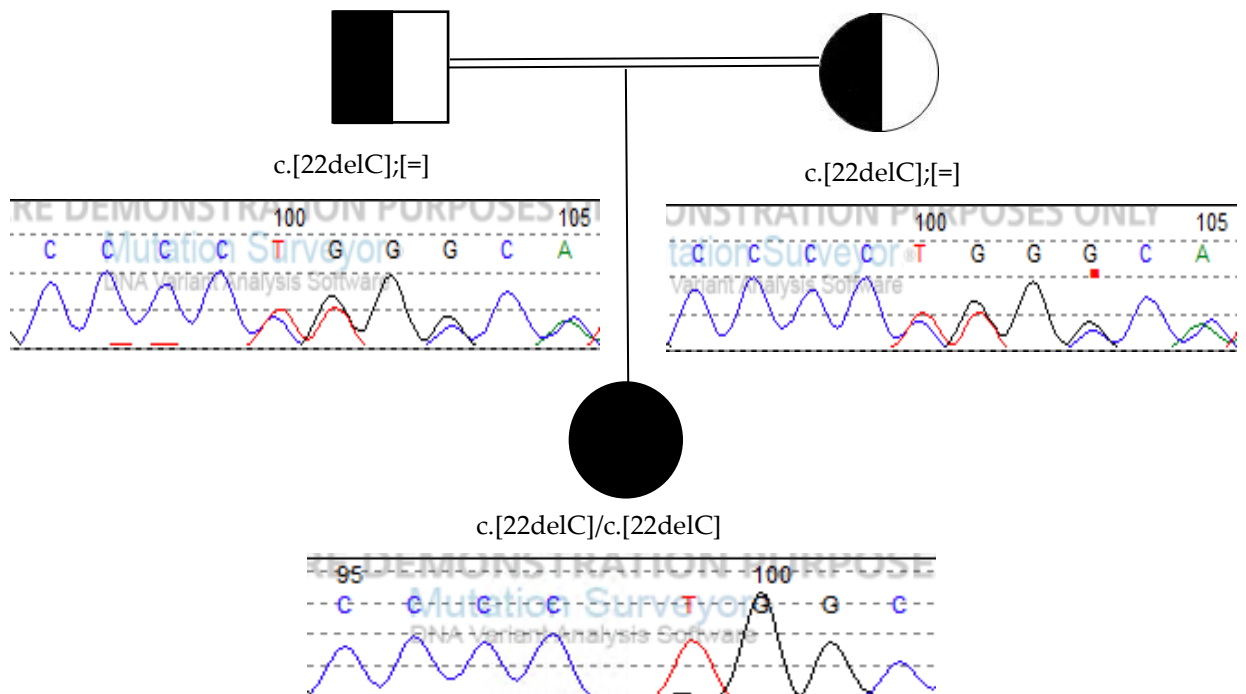

**FIGURE LEGEND:** Pedigrees of families of patient 1 (A) and patient 2 (B) with the variant in *NRL* gene in homozygous status in both patients and heterozygous status in the parents, confirmed by Sanger sequencing.
